# Supplementary material for: Heterogeneous ice nucleation on dust particles sourced from 9 deserts worldwide – Part 1: Immersion freezing
Source: Copernicus journal article supplement (doi:10.5194/acp-2016-438), 2016-06-02
Supplement: Supplementary file 1 [file acp-2016-438-supplement.pdf]

# Heterogeneous ice nucleation on dust particles sourced from 9 deserts worldwide - Part 1: Immersion freezing

Yvonne Boose<sup>1</sup>, André Welti<sup>1,2</sup>, James Atkinson<sup>1</sup>, Fabiola Ramelli<sup>1</sup>, Anja Danielczok<sup>3</sup>, Heinz G. Bingemer<sup>3</sup>, Michael Plötze<sup>4</sup>, Berko Sierau<sup>1</sup>, Zamin A. Kanji<sup>1</sup>, and Ulrike Lohmann<sup>1</sup>

<sup>1</sup>Institute for Atmospheric and Climate Science, ETH Zürich, Zürich, Switzerland

<sup>2</sup>now at Leibniz Institute for Tropospheric Research, Leipzig, Germany

<sup>3</sup>Institute for Atmospheric and Environmental Sciences, J. W. Goethe-University, Frankfurt am Main, Germany

<sup>4</sup>Institute for Geotechnical Engineering, ETH Zürich, Zürich, Switzerland

*Correspondence to:* Y.Boose (yvonne.boose@env.ethz.ch) and Z. A. Kanji (zamin.kanji@env.ethz.ch)

**Table 1.** GPS coordinates of sample collection sites.

| Collection site | type     | latitude | longitude |
|-----------------|----------|----------|-----------|
| Atacama         | sieved   | -22.03   | -67.88    |
| Atacama         | milled   | -22.03   | -67.88    |
| Australia       | milled   | -25.32   | 131.63    |
| Crete           | airborne | 35.34    | 25.67     |
| Dubai           | sieved   | 24.83    | 55.66     |
| Egypt           | airborne | 28.93    | 33.21     |
| Great Basin     | sieved   | 37.16    | -116.49   |
| Peloponnese     | airborne | 37.97    | 23.78     |
| Israel          | sieved   | 30.84    | 34.79     |
| Israel          | milled   | 30.84    | 34.79     |
| Mojave          | sieved   | 36.71    | -117.17   |
| Morocco         | milled   | 31.21    | -3.99     |
| Namib           | sieved   | 18.01    | 16.01     |
| Tenerife        | airborne | 28.31    | -16.50    |
